# Supplementary material for: Efficient electrocatalytic carbon dioxide reduction with tetraphenylethylene- and porphyrin-based covalent organic frameworks
Source: Royal Society of Chemistry journal article supplement (doi:10.1039/d2cy01326f), 2022-01-01
Supplement: d2cy01326f1.pdf [file d2cy01326f1.pdf]

## Electronic Supplementary Information

### **Efficient Electrocatalytic Carbon Dioxide Reduction with Tetraphenylethylene and Porphyrin-Based Covalent Organic Frameworks**

Lei Gong, Ying Gao, Yinhai Wang, Baotong Chen, Baoqiu Yu, Wenbo Liu, Bin Han,  
Chenxiang Lin, Yongzhong Bian, Dongdong Qi and Jianzhuang Jiang

*Beijing Key Laboratory for Science and Application of Functional Molecular and  
Crystalline Materials, Department of Chemistry, School of Chemistry and Biological  
Engineering, University of Science and Technology Beijing, Beijing 100083, China*

*Daxing Research Institute, and Beijing Advanced Innovation Center for Materials  
Genome Engineering, University of Science and Technology Beijing, Beijing 100083,  
China*

*Guangxi Key Laboratory of Natural Polymer Chemistry and Physics, Nanning Normal  
University, Nanning 530001, China*

# Contents

- 1** Experimental section.
- 2** Figure S1. Simulated PXRD patterns of TPE-CoPor-COF and TPTPE-CoPor-COF.
- 3** Figure S2. FT-IR spectra of TPE-CoPor-COF.
- 4** Figure S3. FT-IR spectra of TPTPE-CoPor-COF.
- 5** Figure S4. High-resolution XPS spectra of TPE-CoPor-COF and TPTPE-CoPor-COF.
- 6** Figure S5. The solid state UV spectra of TPE-CoPor-COF and TPTPE-CoPor-COF.
- 7** Figure S6. Pore size distribution of TPE-CoPor-COF.
- 8** Figure S7. Pore size distribution of TPTPE-CoPor-COF.
- 9** Figure S8. SEM and TEM images of TPTPE-CoPor-COF.
- 10** Figure S9. Elemental mappings of TPTPE-CoPor-COF.
- 11** Figure S10. HRTEM images of TPE-CoPor-COF and TPTPE-CoPor-COF.
- 12** Figure S11. TGA curves of TPE-CoPor-COF and TPTPE-CoPor-COF.
- 13** Figure S12. Typical three-electrode H-type cell setup for electrochemical CO<sub>2</sub>RR measurements.
- 14** Figure S13. FE<sub>CO</sub> and FE<sub>H<sub>2</sub></sub> of TPE-CoPor-COF in CO<sub>2</sub>-saturated electrolyte.
- 15** Figure S14. FE<sub>CO</sub> and FE<sub>H<sub>2</sub></sub> of TPTPE-CoPor-COF in CO<sub>2</sub>-saturated electrolyte.
- 16** Figure S15. NMR spectra of the electrolyte after CO<sub>2</sub>RR test for TPE-CoPor-COF.
- 17** Figure S16. NMR spectra of the electrolyte after CO<sub>2</sub>RR test for TPTPE-CoPor-COF.

- 18** Figure S17.  $FE_{CO}$  of TPE-CoPor-COF in Ar-saturated electrolyte.
- 19** Figure S18.  $FE_{CO}$  of TPTPE-CoPor-COF in Ar-saturated electrolyte.
- 20** Figure S19.  $FE_{CO}$  of carbon cloth with Vulcan XC-72R carbon black.
- 21** Figure S20. Faradaic efficiency of CoPor(CHO)<sub>4</sub> in electrocatalysis.
- 22** Figure. S21. Faradaic efficiency of TPE(NH<sub>2</sub>)<sub>4</sub> at different applied potentials in CO<sub>2</sub> saturated 0.5 M KHCO<sub>3</sub> aqueous solution.
- 23** Figure S22. Faradaic efficiency of TPTPE(NH<sub>2</sub>)<sub>4</sub> at different applied potentials in CO<sub>2</sub> saturated 0.5 M KHCO<sub>3</sub> aqueous solution.
- 24** Figure S23. Comparison of CO partial current density for CO<sub>2</sub> electroreduction.
- 25** Figure S24. EIS spectra of TPE-CoPor-COF and TPTPE-CoPor-COF.
- 26** Figure S25. The double-layer capacitances of TPE-CoPor-COF and TPTPE-CoPor-COF.
- 27** Figure S26. High-resolution XPS scan of Co 2p for TPE-CoPor-COF after CO<sub>2</sub>RR testing.
- 28** Figure S27. PXRD pattern of TPE-CoPor-COF after CO<sub>2</sub>RR testing.
- 29** Figure S28. TEM and SEM images of TPE-CoPor-COF after CO<sub>2</sub>RR testing.
- 30** Figure S29. The calculated LUMO and HOMO populations of the repeat unit in TPE-CoPor-COF.
- 31** Figure S30. The calculated LUMO and HOMO populations of the repeat unit in TPTPE-CoPor-COF.
- 32** Table S1. Fractional atomic coordinates in the refined unit cell of TPE-CoPor-COF.
- 33** Table S2. Fractional atomic coordinates in the refined unit cell of TPTPE-CoPor-

COF.

**34** Table S3. ICP-OES results for the metal contents of TPE-CoPor-COF and TPTPE-CoPor-COF.

**35** Table S4. Comparison of the electrocatalytic performance for COF-based electrocatalysts in H-cells.

**36** References.

## EXPERIMENTAL SECTION

### Materials

CoPor(CHO)<sub>4</sub> were synthesized following the published procedure.<sup>1</sup> All other reagents were commercially available and used as received.

### Characterization

NMR spectra were recorded on a Bruker DPX 400 spectrometer (<sup>1</sup>H: 400 MHz) in D<sub>2</sub>O. Powder X-ray diffraction (PXRD) was collected at room temperature on a PANalytical Empyrean series 3 diffractometer equipped with Cu K<sub>α</sub> radiation. FT-IR spectra were recorded as KBr pellets using a Bruker Tensor 37 spectrometer with 2 cm<sup>-1</sup> resolution. X-ray photoelectron spectroscopy (XPS) data were recorded on a Thermo Scientific K-Alpha system. Al K<sub>α</sub> X-ray (6 mA / 12 KV) was utilized as the irradiation source. All XPS measurements were performed in the CAE mode with the reference of C 1s (284.8 eV). The nitrogen adsorption and desorption isotherms were measured at 77 K and the CO<sub>2</sub> adsorption and desorption isotherms were measured at 298 K using a Micromeritics ASAP 2020 PLUS HD88 system. The samples were degassed at 90°C for 4 hours before the measurements. The thermogravimetric analysis (TGA) was performed on a Rigaku TG-DTA8122 instrument over the temperature range from 30 to 800°C under nitrogen atmosphere with a heating rate of 10°C/min. The metal contents of TPE-CoPor-COF and TPTPE-CoPor-COF were determined by inductively coupled plasma (ICP) analysis with an Agilent 5110 ICP-OES instrument.

Energy dispersive spectroscopy (EDS) mapping images were collected by transmission electron microscopy (JEM-2100F) at an operation voltage of 200 kV. Scanning electron microscopy (SEM) images were obtained on a HITACHI SU8010 microscope. UV-vis-NIR diffuse reflectance spectra (DRS) were recorded on a Shimadzu UV-2600 UV-vis-NIR spectrophotometer with BaSO<sub>4</sub> as the reference.

### **Synthesis of TPE-CoPor-COF**

CoPor(CHO)<sub>4</sub> (18.8 mg, 0.024 mmol), TPE(NH<sub>2</sub>)<sub>4</sub> (9.4 mg, 0.024 mmol), *n*-butanol (0.36 mL), *o*-dichlorobenzene (1.44 mL), and 6 M aqueous acetic acid (0.18 mL) were mixed in a Pyrex tube (9 × 6 mm, o.d. × i.d.). After sonication for 10 min, the Pyrex tube was rapidly frozen in a liquid nitrogen bath and degassed. After the above process was repeated three times, the tube was sealed with alcohol torch. After the Pyrex tube were warmed to room temperature, the tube was placed in an oven at 120°C for 72 h. The obtained COFs was placed in a Soxhlet extractor and washed with tetrahydrofuran (24 h) and chloroform (24 h) in turn. Finally, the product was dried under vacuum at 70°C for 12 h to provide TPE-CoPor-COF as purple powder (19.7 mg, ~70% yield).

### **Synthesis of TPTPE-CoPor-COF**

TPTPE-CoPor-COF (21.7 mg, ~61% yield) was synthesized following the similar procedure for TPE-CoPor-COF, except that TPE(NH<sub>2</sub>)<sub>4</sub> was replaced with TPTPE(NH<sub>2</sub>)<sub>4</sub>.

### **Electrochemical measurements.**

All electrocatalysis tests were conducted at room temperature in a standard three-electrode configuration using H-type cell on an electrochemical workstation (chi760E). In the H-type cell, two compartments equipped with 0.5 M KHCO<sub>3</sub> aqueous solution were separated by an anion exchange membrane (Nafion-117). Ag/AgCl electrode and Pt foil were served as the reference and counter electrodes, respectively. A catalyst-modified carbon fiber paper electrode was used as the work electrode.

COFs or CoPor(CHO)<sub>4</sub>/TPE(NH<sub>2</sub>)<sub>4</sub>/TPTPE(NH<sub>2</sub>)<sub>4</sub> (5 mg), Vulcan XC-72R carbon black (5 mg), ethanol (965  $\mu$ L) and Nafion perfluorinated resin solution (35  $\mu$ L, 10 wt. % in H<sub>2</sub>O) were mixed in a vial. Homogeneous pastes were formed after sonication for 60 min. To make sure that loading density of electrode materials was 1 mg cm<sup>-2</sup>, 100  $\mu$ L paste was dropped evenly onto a piece of carbon fiber paper (1 cm  $\times$  1 cm). The catalyst-modified carbon fiber paper electrode was placed in dark for 12 h. Before each electrochemical test, the electrolyte solution was saturated with Ar or CO<sub>2</sub> for 30 min. Linear sweep voltammetry (LSV) polarization curves were measured from 0 to -1.63 V vs. Ag/AgCl with a scan rate of 10 mV s<sup>-1</sup>. On account of the following equation:  $E$  (vs. RHE) =  $E$  (vs. Ag/AgCl) + 0.197 V + 0.059  $\times$  pH, the results of electrocatalysis in this work were presented vs. RHE. Besides, no  $iR$  compensation was carried out for all LSV polarization curves.

EIS spectroscopies were measured under an AC voltage of -1.5 V vs Ag/AgCl with 5 mV amplitude in a frequency range from 1000 kHz to 100 mHz. Cyclic voltammograms (CV) tests were conducted to obtain  $C_{dl}$  under the potential window from 0.29 to 0.19 V vs. RHE with various scan rates from 10 to 100 mV s<sup>-1</sup> to estimate

the ECSA.

### Structure modeling

The unit cells of the models were refined with the experimental PXRD data of TPE-CoPor-COF and TPTPE-CoPor-COF by using the Le Bail refinement. The cell parameters and the refined PXRD patterns were obtained until the values of  $R_{wp}$  and  $R_p$  converged.

### DFT calculation methods

Density functional theory (DFT) calculations were performed by PBE0-D3 method with Becke-Johnson damping.<sup>2,3</sup> A mixed basis set, including 6-31G(d) for C/H/N/O and SDD for Co, was utilized to optimize the structures and calculate the Gibbs free energies using Gaussian 09 program (version D.01).<sup>4-8</sup> Besides, the solvation model based on density (SMD) was used to simulate the aqueous environment.<sup>9</sup>

The electrocatalytic mechanisms were studied based on Nørskov's computational hydrogen electrode model.<sup>10,11</sup> In this technique, zero voltage was defined based on the potential energy ( $\mu$ ) of components involved in the reversible hydrogen electrode at all pH, T and p, therefore,  $\mu(\text{H}^+) + \mu(\text{e}^-) = \frac{1}{2}\mu(\text{H}_2)$  at a potential of 0 V. The pathways adopted for CO<sub>2</sub> reduction to CO in this work are listed below (\* represents the active site):

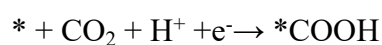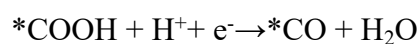



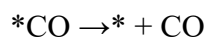

In addition, the pathway adopted for hydrogen evolution reaction (HER) in this work is shown as below:

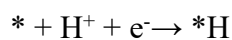

### Calculation of Faradaic Efficiency

The Faradaic efficiencies (FEs) for CO production at each applied potential were calculated based on the following equation:

$$FE = \frac{j_{CO}}{j_{total}} = \frac{\nu_{CO} \times N \times F}{j_{total}}$$

$j_{CO}$ : partial current density for CO production;  $j_{total}$ : total current density;  $\nu_{CO}$ : the production rate of CO; N: the number of transferred electrons (2 for CO); F: Faradaic constant, 96485 C mol<sup>-1</sup>.

### Calculation of Turnover Frequency (TOF, s<sup>-1</sup>)

The TOF for CO was calculated based on the following equation:

$$TOF = \frac{j_{total} \times FE_{CO} / NF}{\omega_{m_{cat}} / M}$$

$j_{total}$ : total current density;  $FE_{CO}$ : Faradaic efficiency for CO production (%); N: the number of electrons (2 for CO); F: Faradaic constant, 96485 C mol<sup>-1</sup>;  $\omega$ : the metal content of Co;  $m_{cat}$ : the catalyst mass in the electrode; M: the atomic mass of Co.

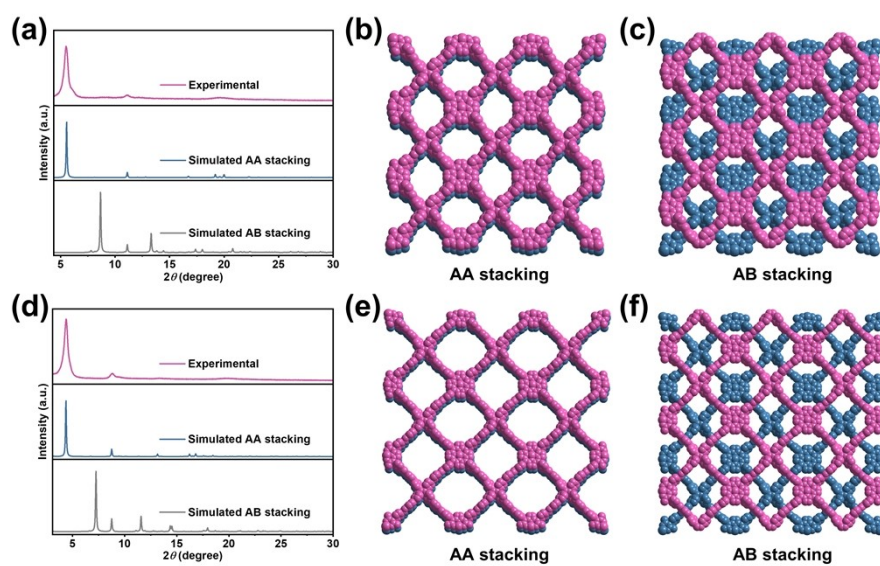

**Fig. S1.** Simulated PXRD patterns (a), AA stacking model (b) and AB stacking model (c) of TPE-CoPor-COF; Simulated PXRD patterns (d), AA stacking model (e) and AB stacking model (f) of TPTPE-CoPor-COF.

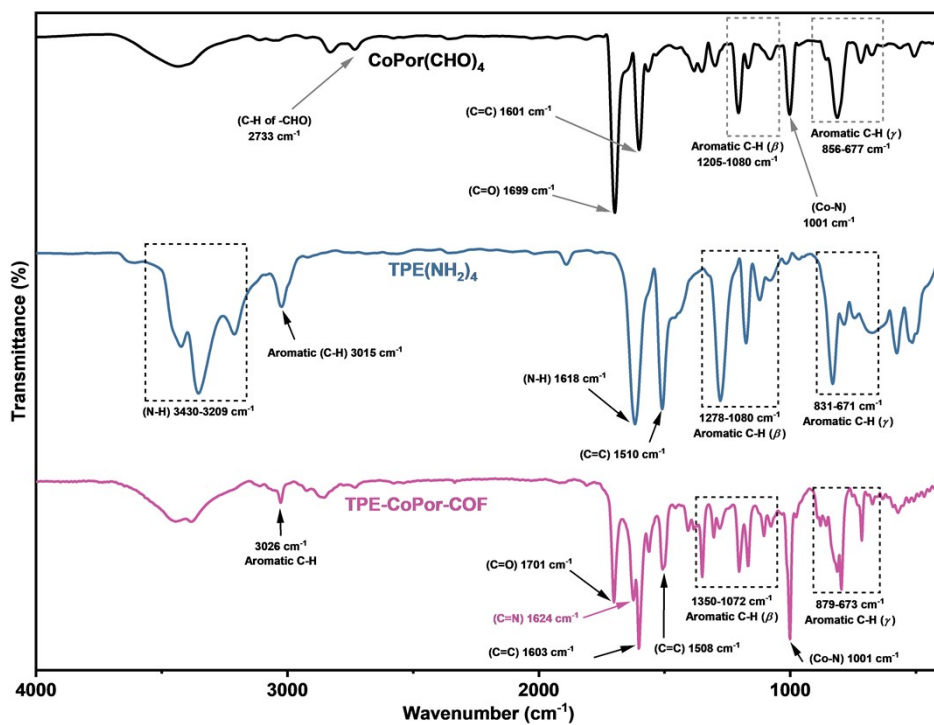

Fig. S2. FT-IR spectra of TPE-CoPor-COF.

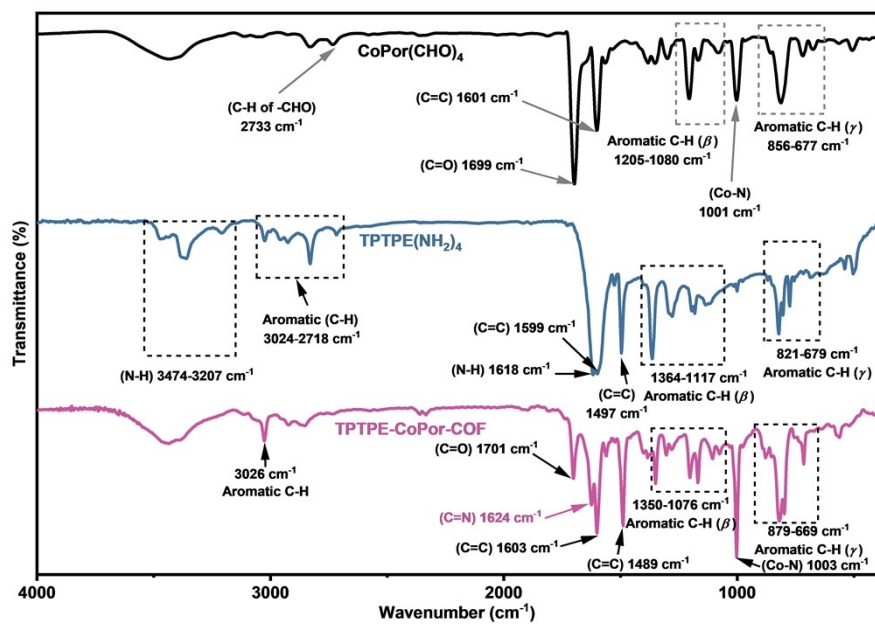

**Fig. S3.** FT-IR spectra of TPTPE-CoPor-COF.

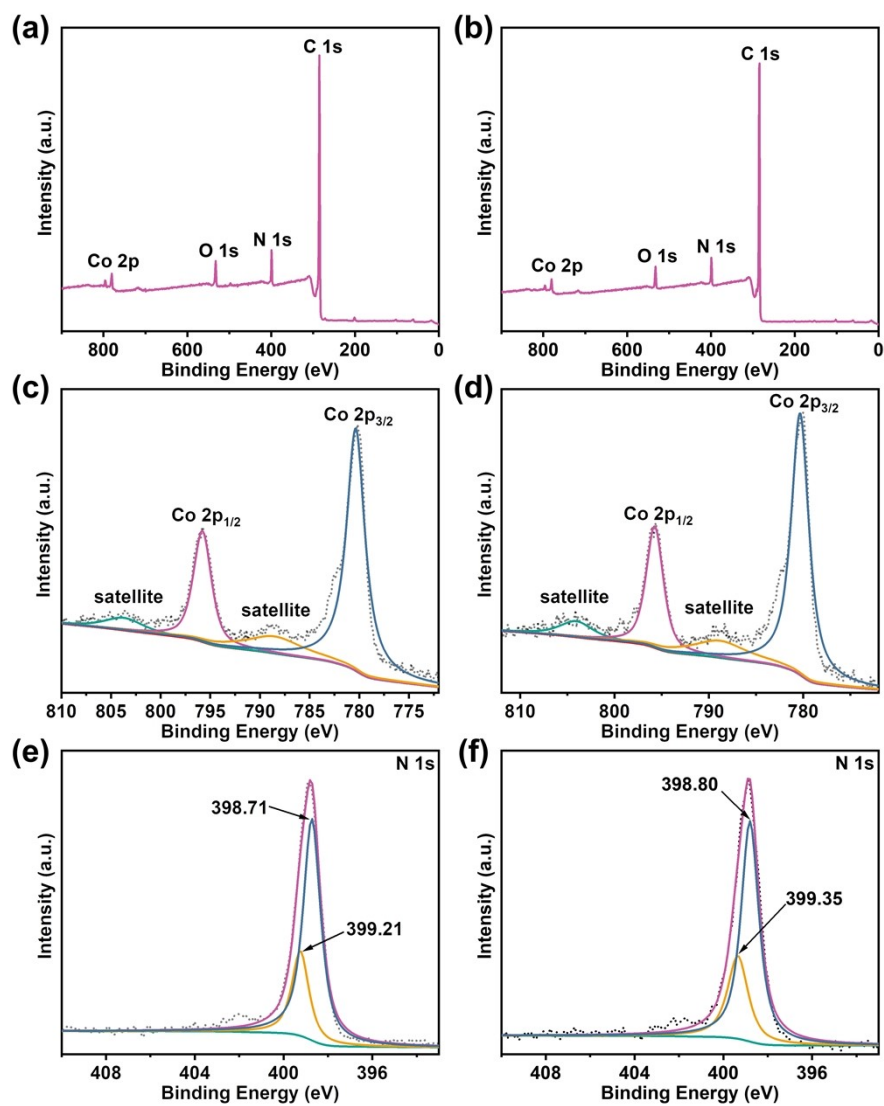

**Fig. S4.** Total XPS spectra of TPE-CoPor-COF (a), high-resolution scan of Co 2p (c) and high-resolution scan of N 1s (e) for TPE-CoPor-COF; Total XPS spectrum of TPTPE-CoPor-COF (b), High-resolution scan of Co 2p (d) and High-resolution scan of N 1s (f) for TPTPE-CoPor-COF.

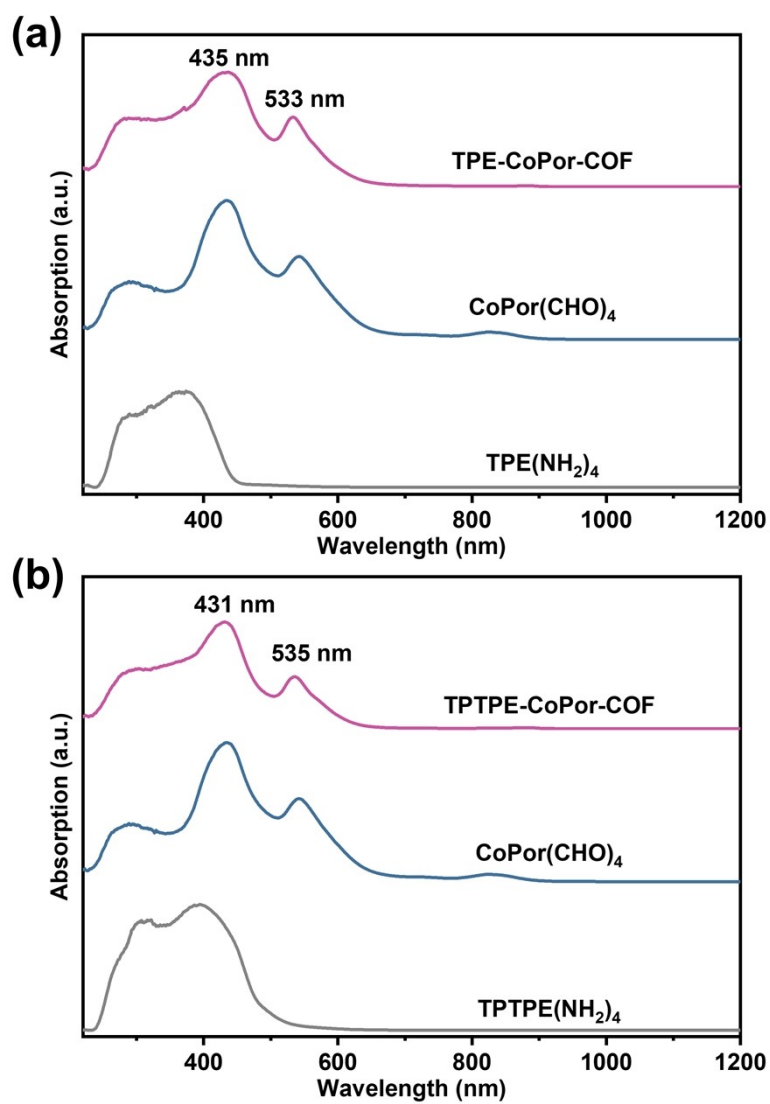

**Fig. S5.** The solid state UV-vis-NIR diffuse reflectance spectra (DRS) of (a) TPE-CoPor-COF and (b) TPTPE-CoPor-COF.

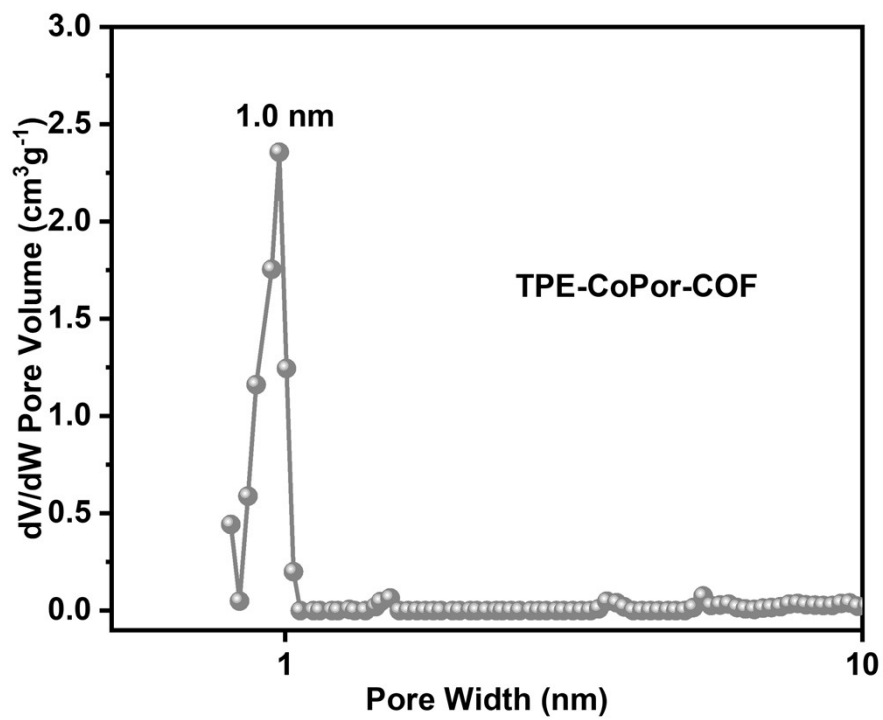

**Fig. S6.** Pore size distribution of TPE-CoPor-COF.

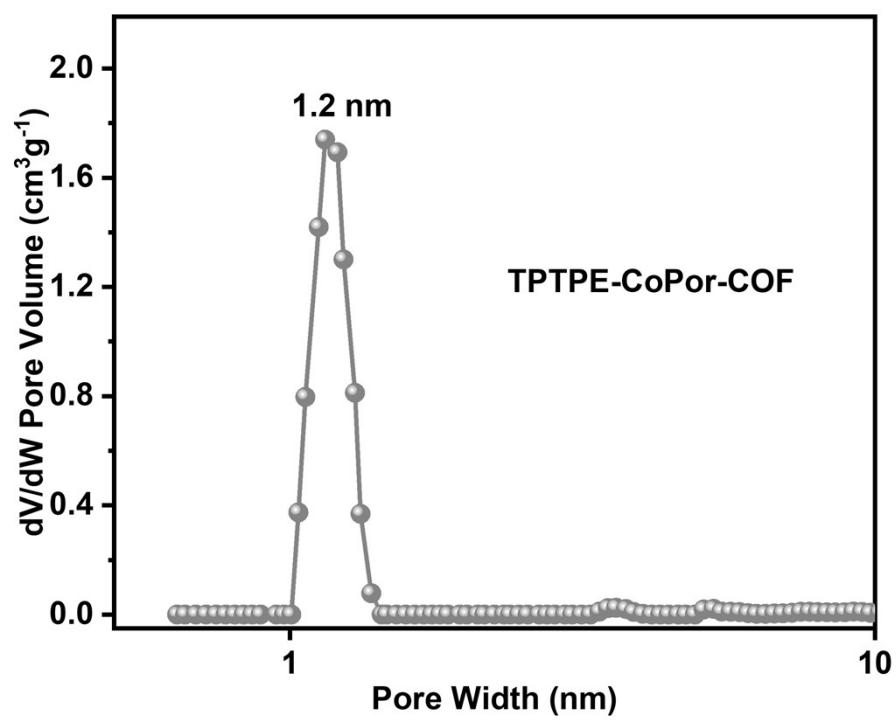

Fig. S7. Pore size distribution of TPTPE-CoPor-COF.



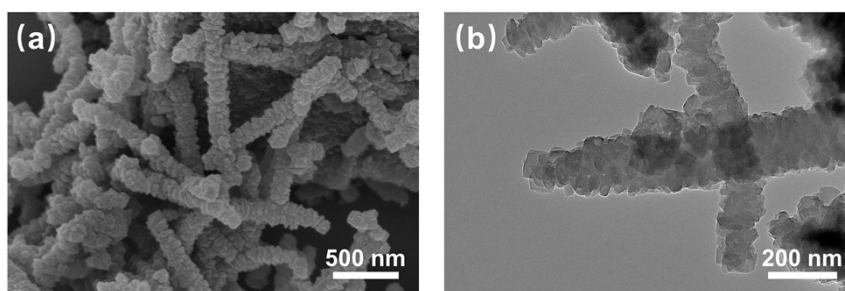

**Fig. S8.** (a) SEM and (b) TEM images of TPTPE-CoPor-COF.

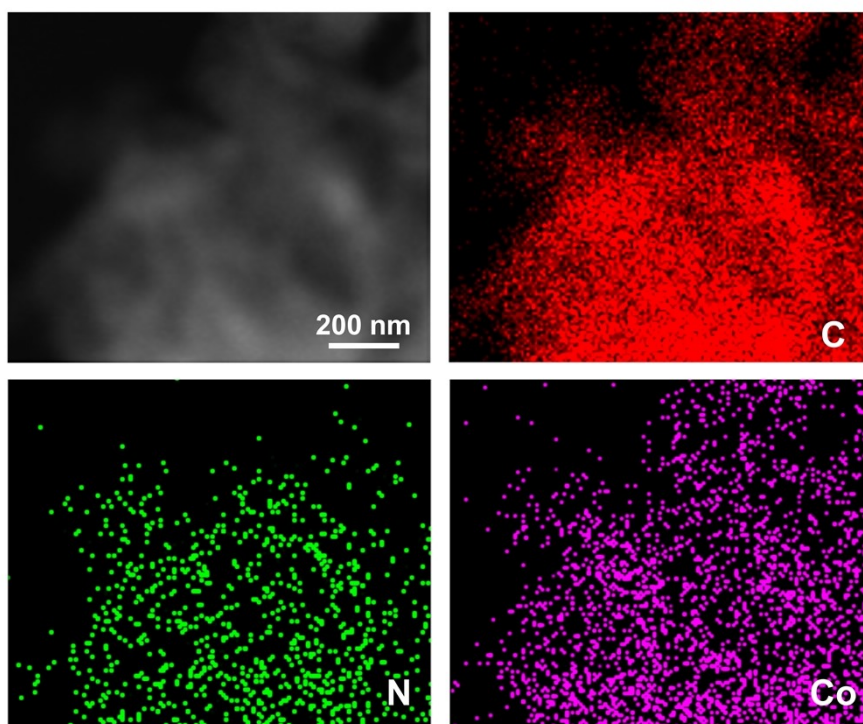

**Fig. S9.** Energy-dispersive spectroscopy (EDS) mappings of TPTPE-CoPor-COF.

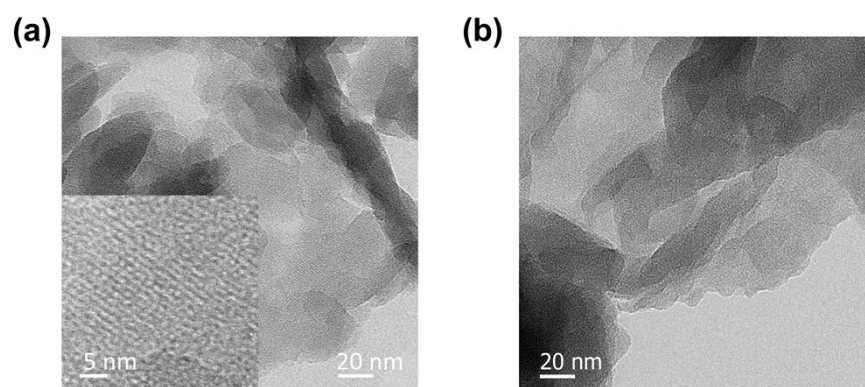

**Fig. S10.** HRTEM images of (a) TPE-CoPor-COF and (b) TPTPE-CoPor-COF.

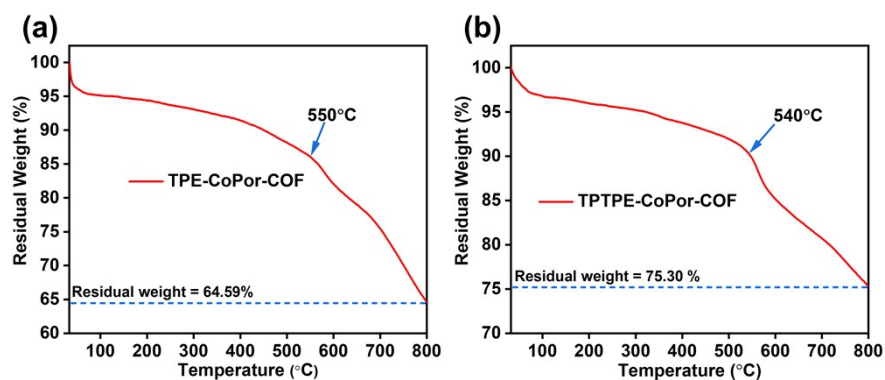

**Fig. S11.** Thermal gravimetric analysis of TPE-CoPor-COF and TPTPE-CoPor-COF, with a constant heating rate of  $10^{\circ}\text{C min}^{-1}$  from room temperature to  $800^{\circ}\text{C}$  under  $\text{N}_2$  atmosphere.

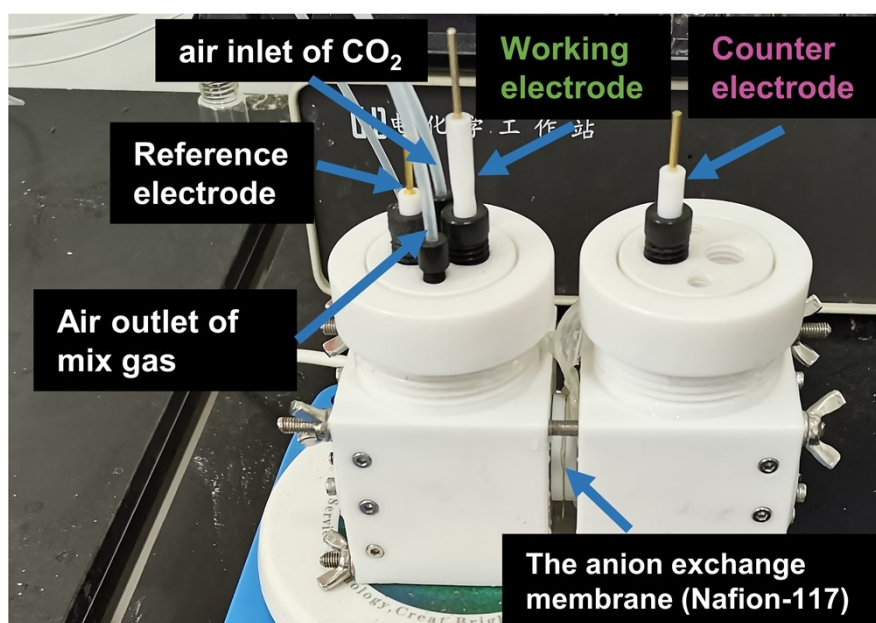

**Fig. S12.** Typical three-electrode H-type cell setup for electrochemical CO<sub>2</sub>RR measurements.

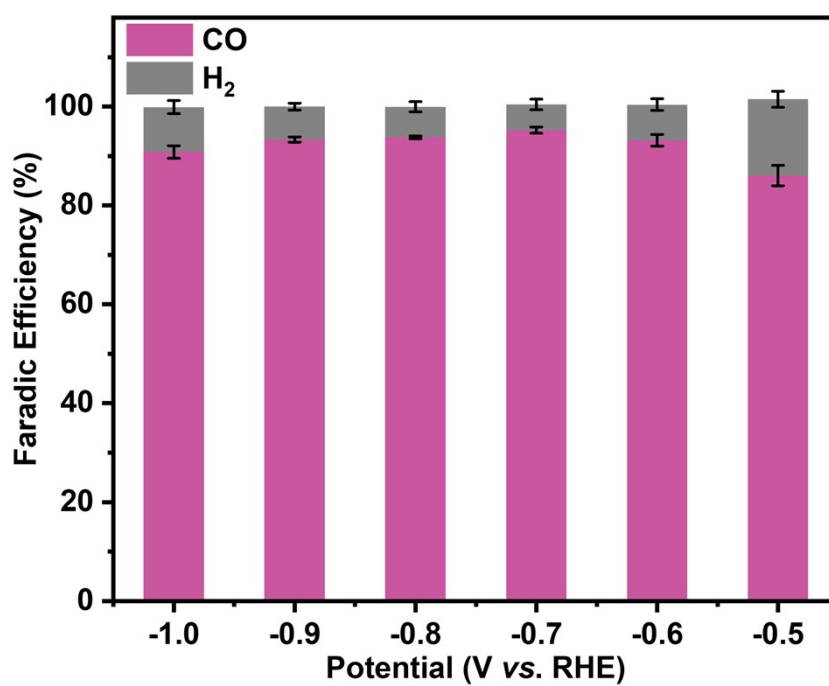

**Fig. S13.** FE<sub>CO</sub> and FE<sub>H<sub>2</sub></sub> of TPE-CoPor-COF at different applied potentials in CO<sub>2</sub> saturated 0.5 M KHCO<sub>3</sub> aqueous solution.

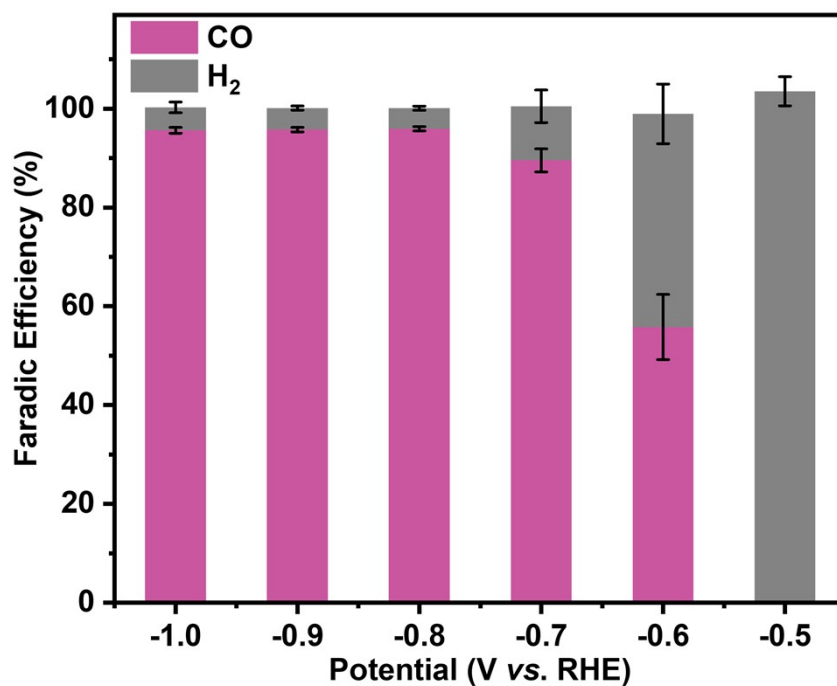

**Fig. S14.** FE<sub>CO</sub> and FE<sub>H<sub>2</sub></sub> of TPTPE-CoPor-COF at different applied potentials in CO<sub>2</sub> saturated 0.5 M KHCO<sub>3</sub> aqueous solution.

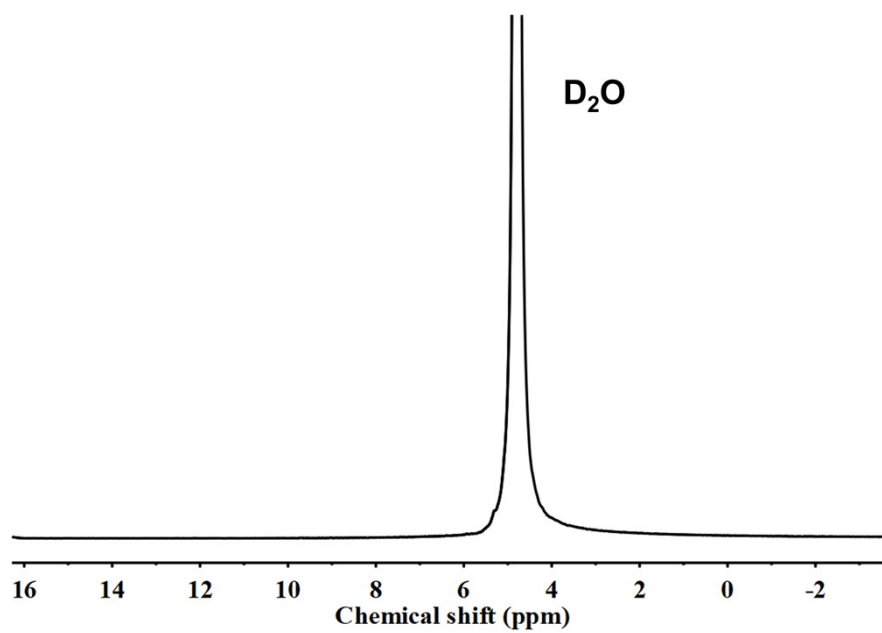

**Fig. S15.**  $^1\text{H}$  NMR spectrum of the electrolyte for TPE-CoPor-COF after continuous  $\text{CO}_2\text{RR}$  tests (-0.50 to -1.0 V vs. RHE) in  $\text{D}_2\text{O}$ .

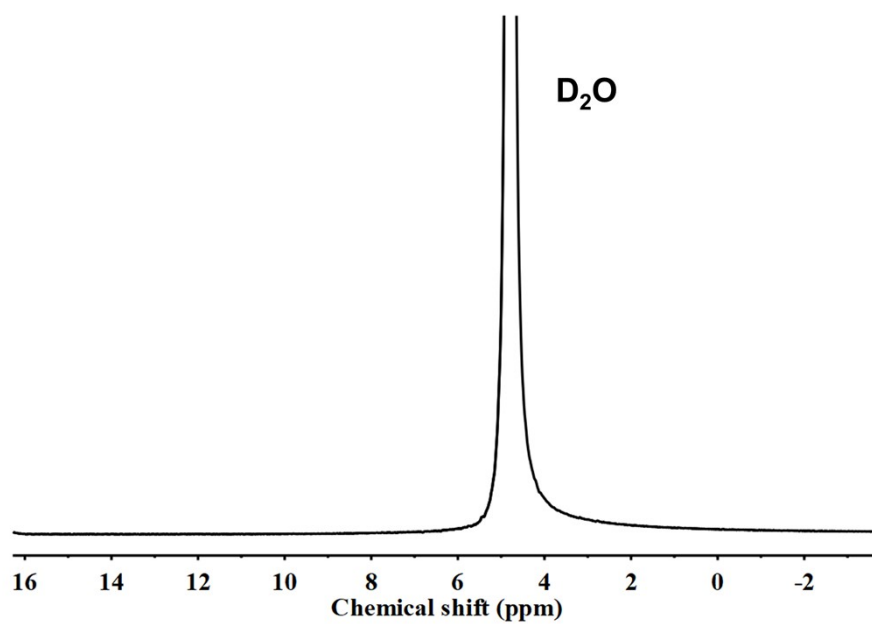

**Fig. S16.**  $^1\text{H}$  NMR spectrum of the electrolyte for TPTPE-CoPor-COF after continuous  $\text{CO}_2\text{RR}$  tests (-0.50 to -1.0 V vs. RHE) in  $\text{D}_2\text{O}$ .



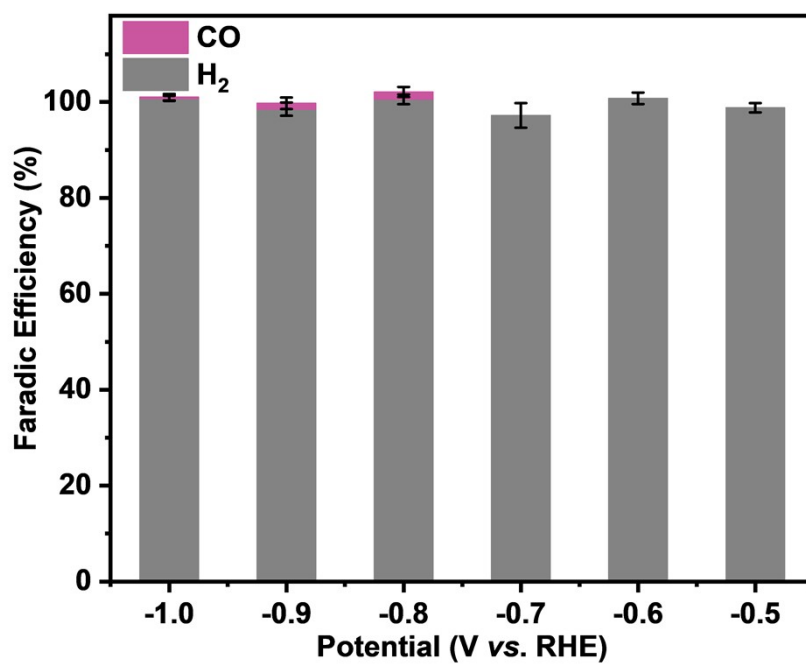

**Fig. S17.** FE<sub>CO</sub> and FE<sub>H<sub>2</sub></sub> of TPE-CoPor-COF at different applied potentials in Ar saturated 0.5 M KHCO<sub>3</sub> aqueous solution.

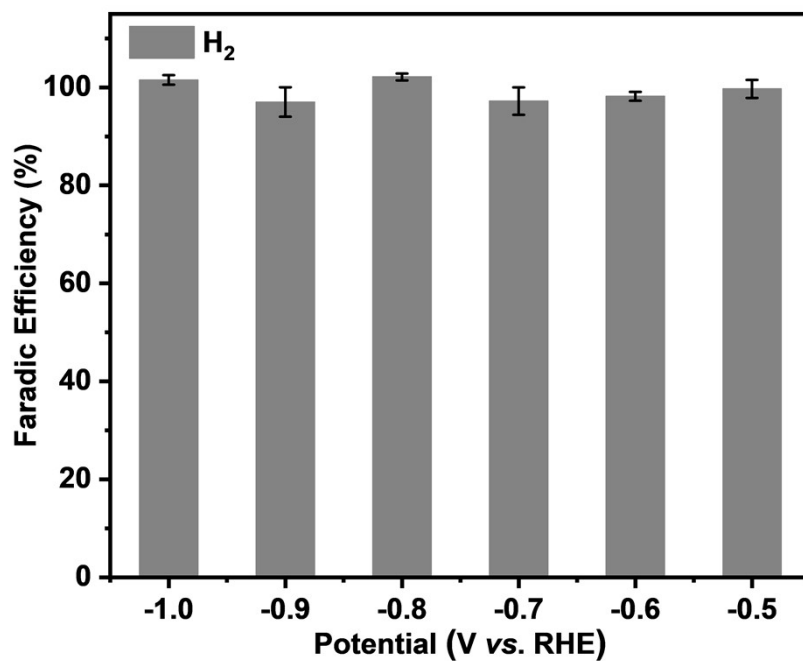

**Fig. S18.**  $FE_{CO}$  and  $FE_{H_2}$  of TPTPE-CoPor-COF at different applied potentials in Ar saturated 0.5 M  $KHCO_3$  aqueous solution.

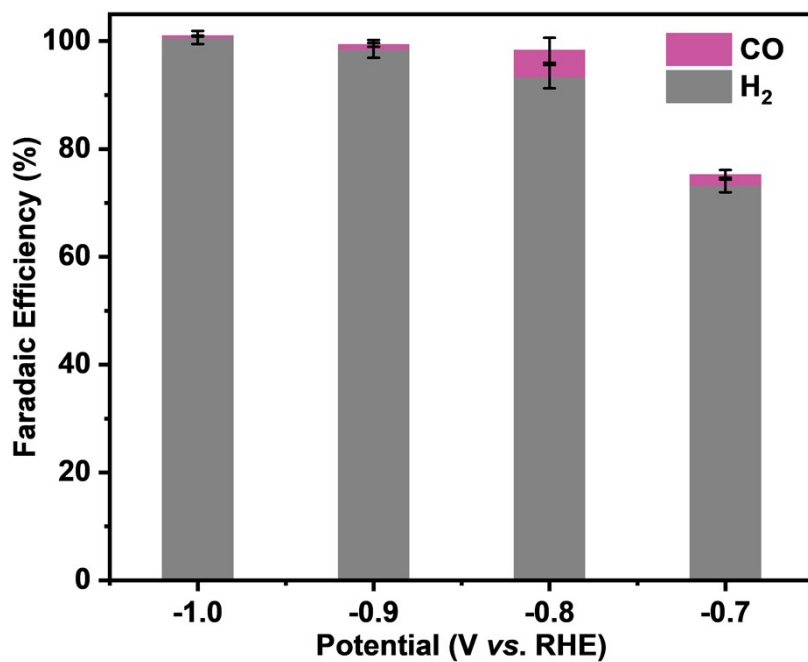

**Fig. S19.** FE<sub>CO</sub> and FE<sub>H<sub>2</sub></sub> of the carbon cloth with Vulcan XC-72R carbon black and Nafion at different applied potentials in CO<sub>2</sub> saturated 0.5 M KHCO<sub>3</sub> aqueous solution.

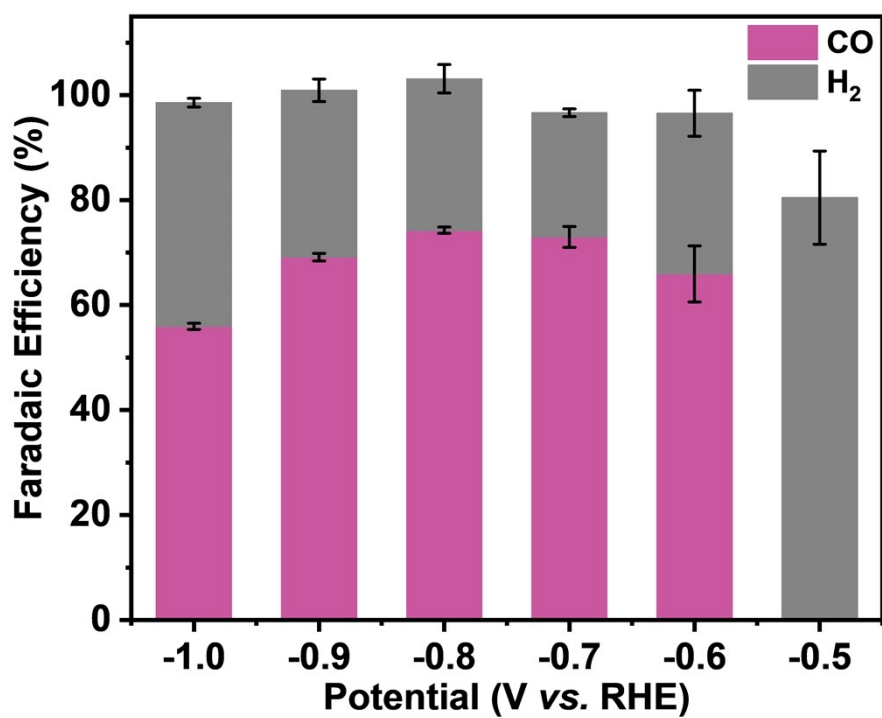

**Fig. S20.** FE<sub>CO</sub> and FE<sub>H<sub>2</sub></sub> of CoPor(CHO)<sub>4</sub> at different applied potentials in CO<sub>2</sub> saturated 0.5 M KHCO<sub>3</sub> aqueous solution.

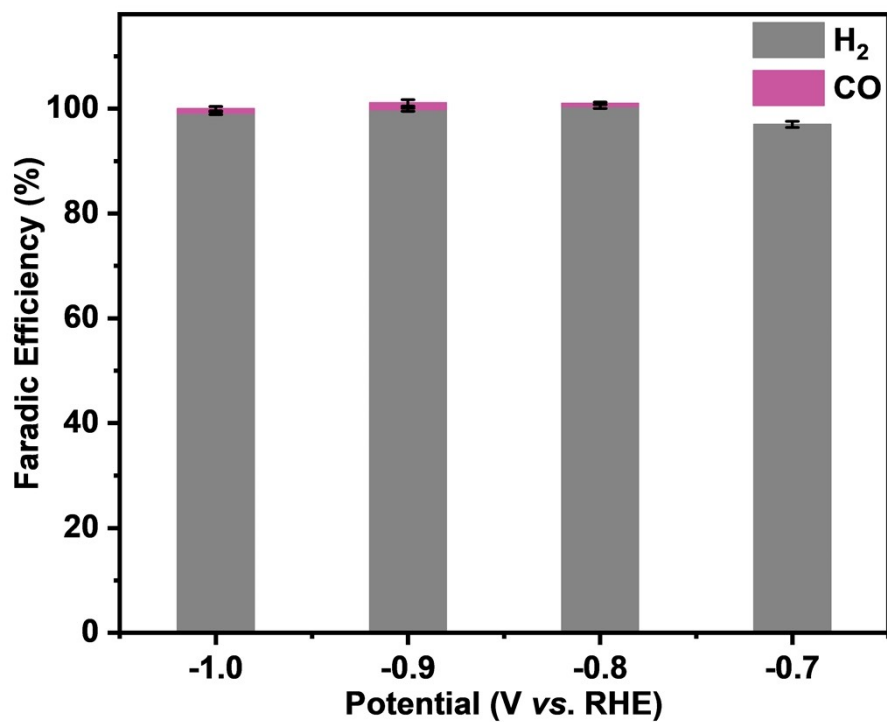

**Fig. S21.** FE<sub>CO</sub> and FE<sub>H<sub>2</sub></sub> of TPE(NH<sub>2</sub>)<sub>4</sub> at different applied potentials in CO<sub>2</sub> saturated 0.5 M KHCO<sub>3</sub> aqueous solution.

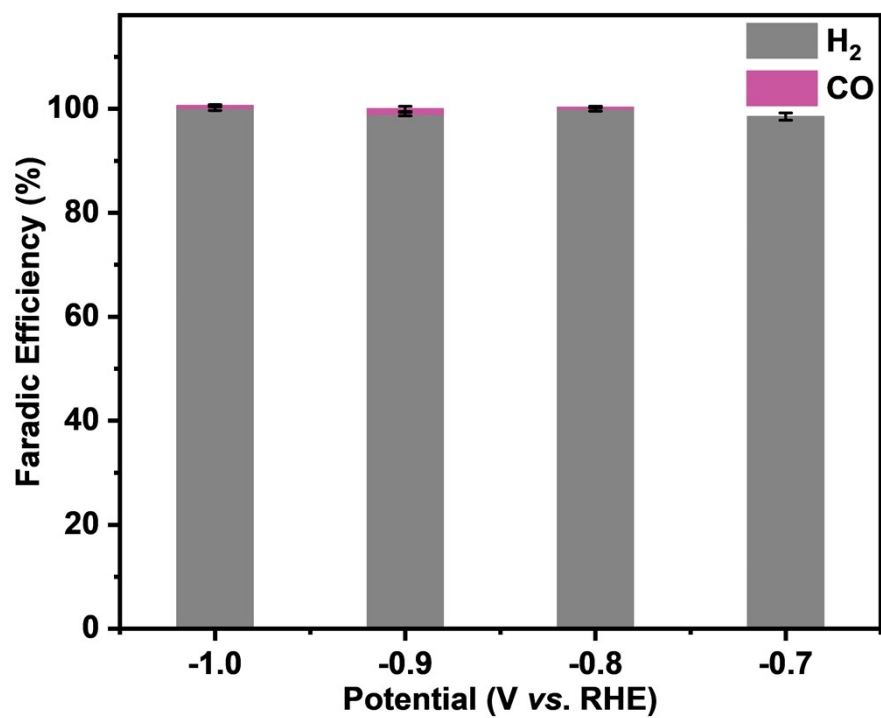

**Fig. S22.**  $FE_{CO}$  and  $FE_{H_2}$  of TPTPE(NH<sub>2</sub>)<sub>4</sub> at different applied potentials in CO<sub>2</sub> saturated 0.5 M KHCO<sub>3</sub> aqueous solution.

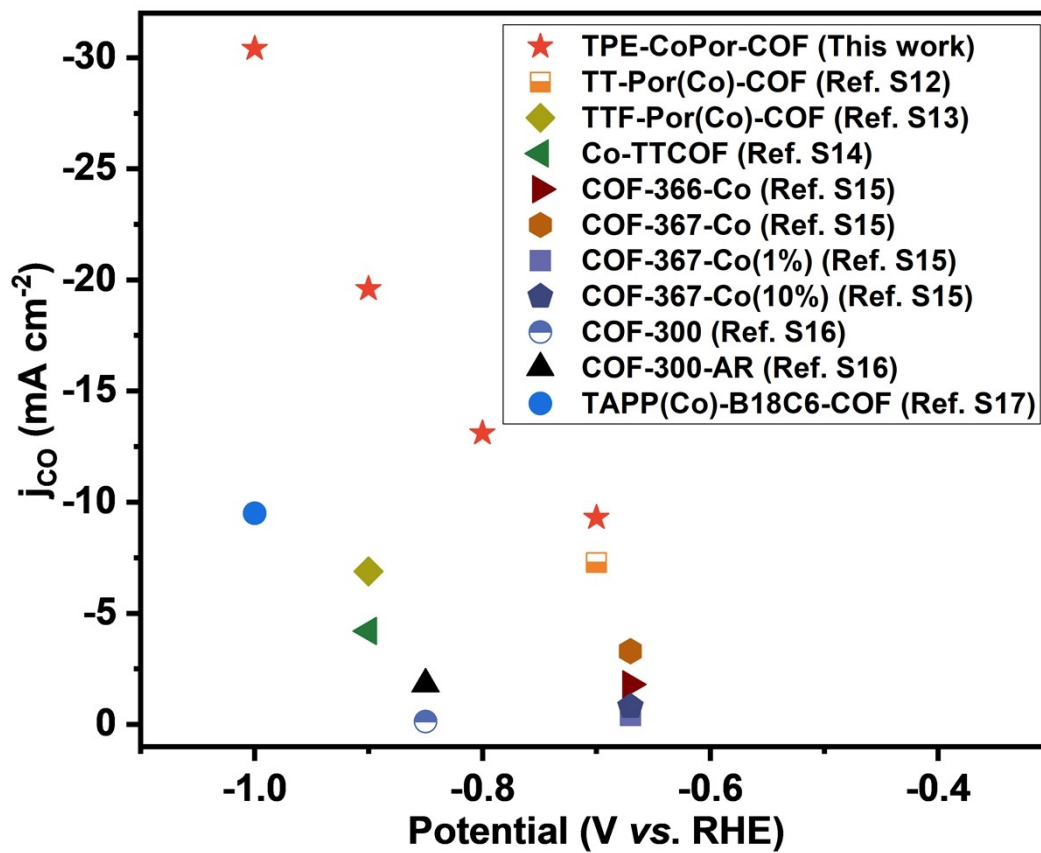

Fig. S23. Comparison of CO partial current density for  $\text{CO}_2$  electroreduction.

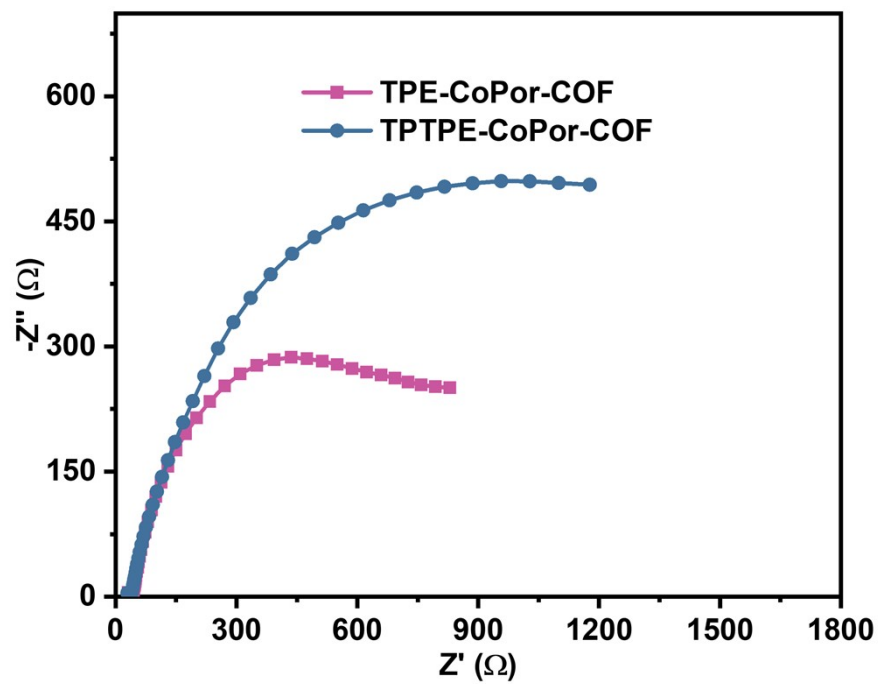

**Fig. S24.** EIS spectra of TPE-CoPor-COF and TPTPE-CoPor-COF.



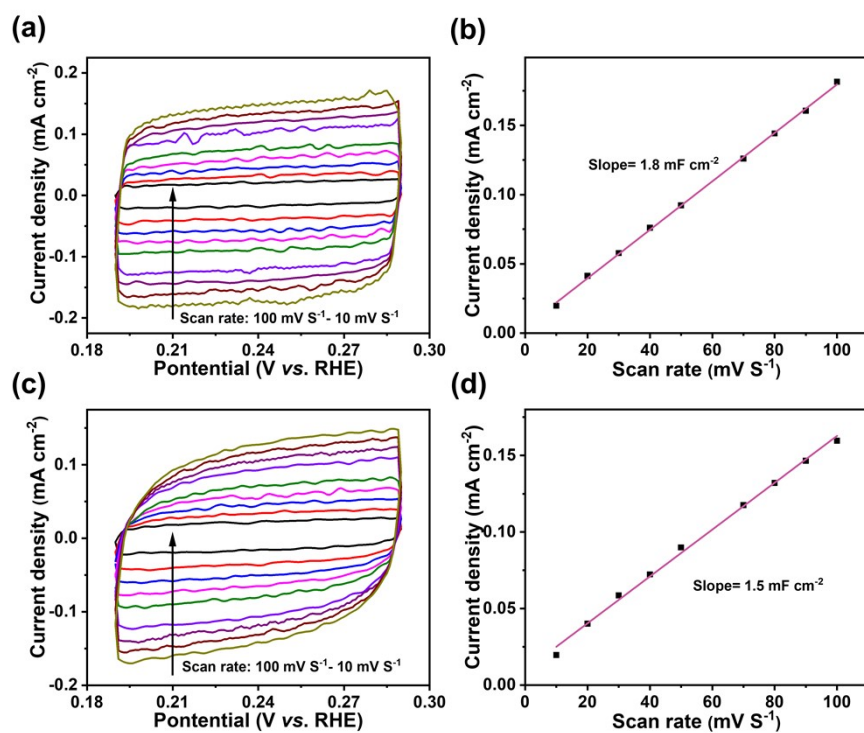

**Fig. S25.** Cyclic voltammogram (CV) curves in the region from 0.29 to 0.19 V vs. RHE at various scan rates (from 10 to 100  $\text{mV s}^{-1}$ ) and corresponding capacitive current at 0.05 V for TPE-CoPor-COF (a), (b) and TPTPE-CoPor-COF (c), (d).

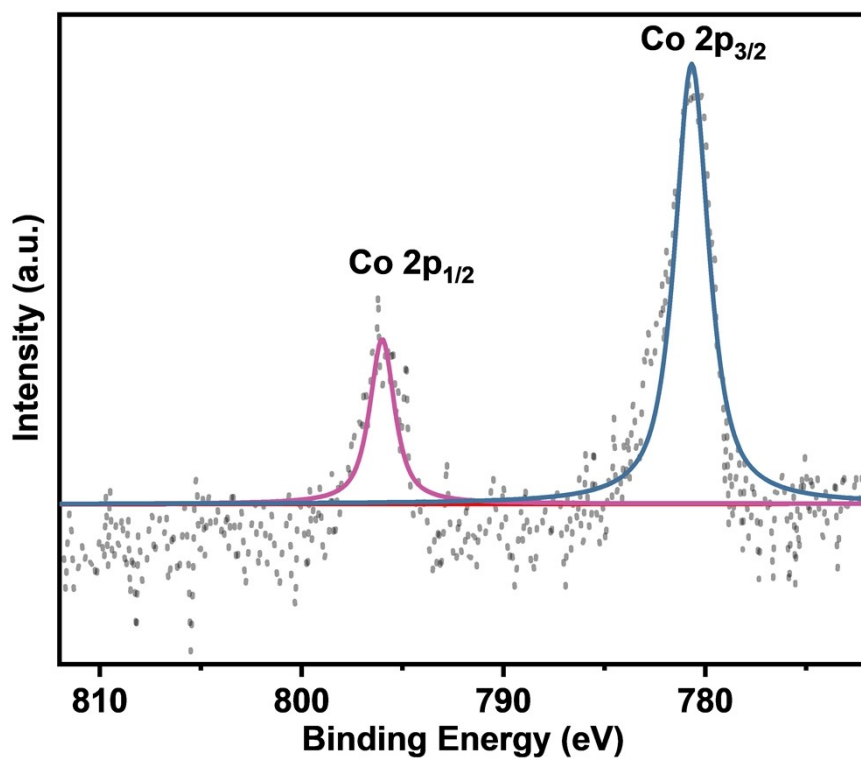

**Fig. S26.** High-resolution XPS scan of Co 2p for TPE-CoPor-COF after CO<sub>2</sub>RR testing.

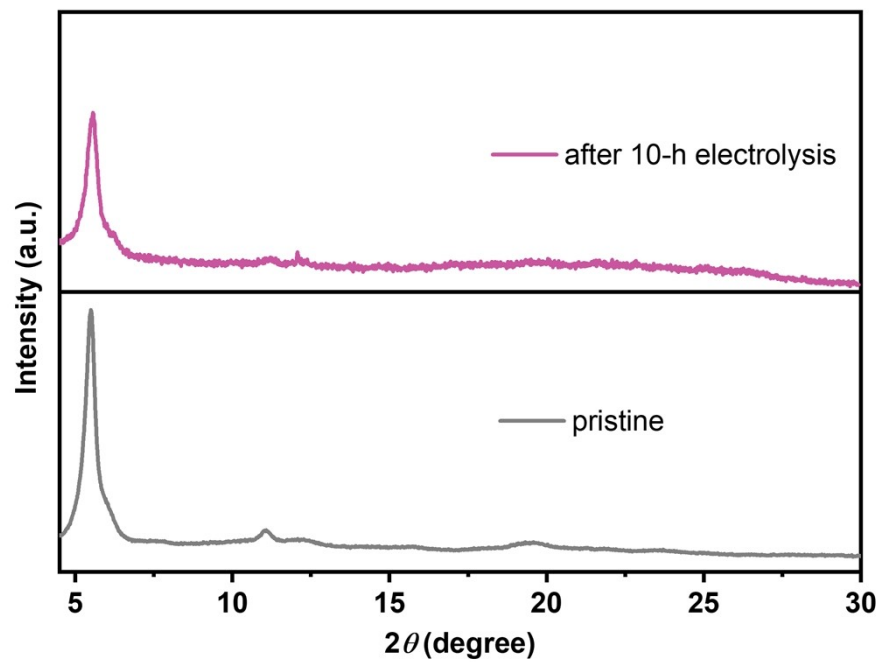

**Fig. S27.** PXRD patterns of TPE-CoPor-COF before and after  $\text{CO}_2\text{RR}$  testing.

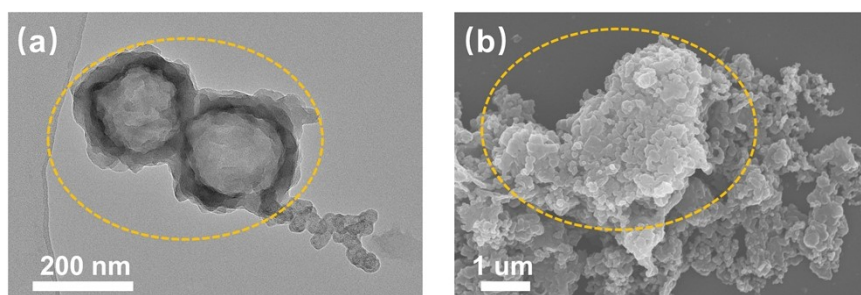

**Fig. S28.** TEM (a) and SEM (b) images of TPE-CoPor-COF after CO<sub>2</sub>RR testing.

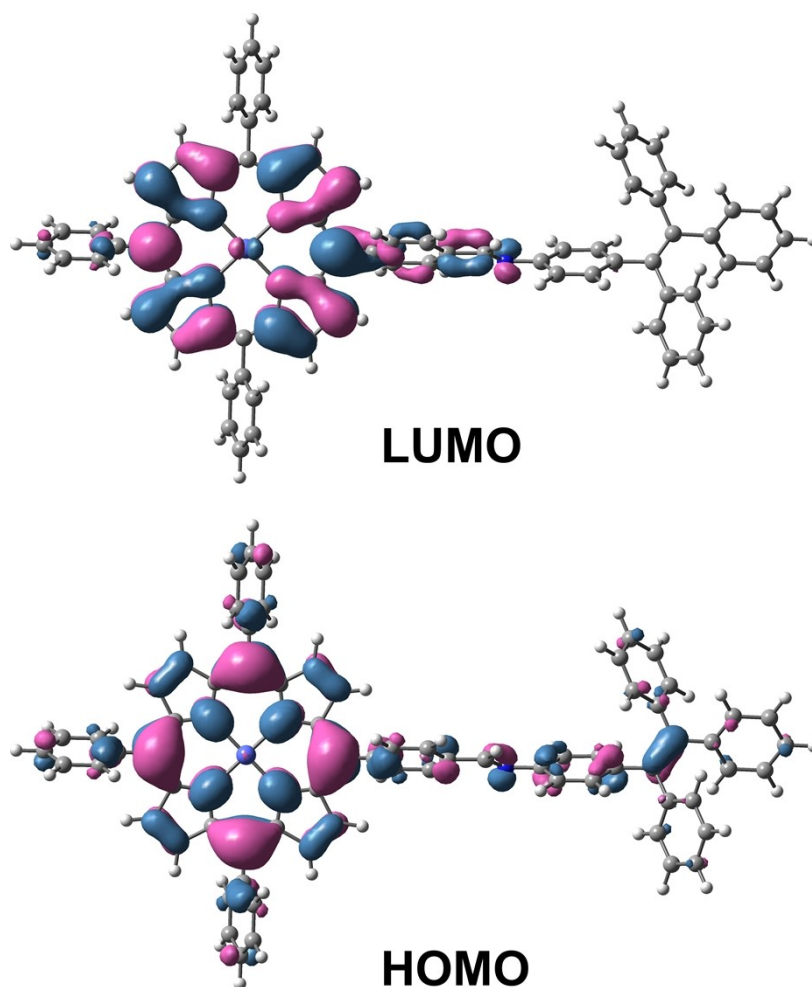

**Fig. S29.** The calculated LUMO and HOMO populations of the repeat unit in TPE-CoPor-COF (the isovalue of the surface is 0.02 a.u.).

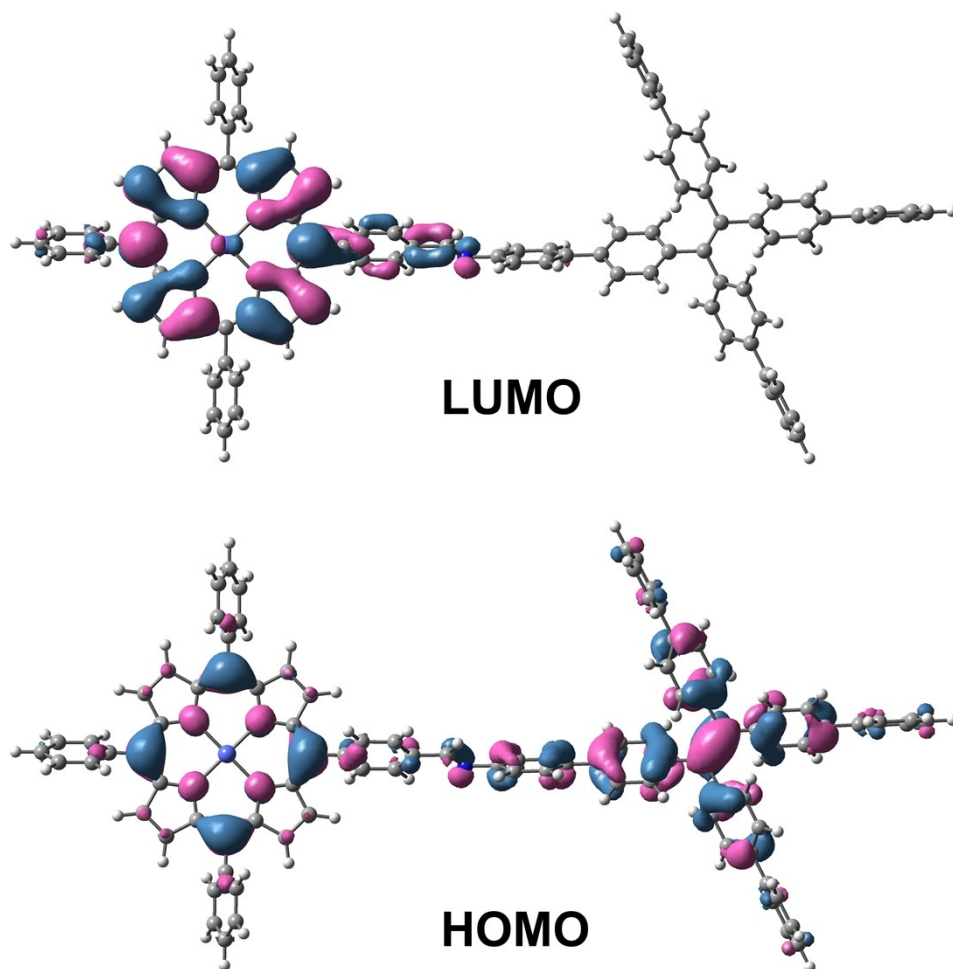

**Fig. S30.** The calculated LUMO and HOMO populations of the repeat unit in TPTPE-CoPor-COF (the isovalue of the surface is 0.02 a.u.).

**Table S1.** Fractional atomic coordinates in the refined unit cell of TPE-CoPor-COF.

| Space group : <i>P222</i> (TPE-CoPor-COF) |         |         |         |      |         |         |         |
|-------------------------------------------|---------|---------|---------|------|---------|---------|---------|
| a = 21.6952, b = 23.3738, c= 4.6216       |         |         |         |      |         |         |         |
| $\alpha = \beta = \gamma = 90^\circ$      |         |         |         |      |         |         |         |
| Atom                                      | x       | y       | z       | Atom | x       | y       | z       |
| C1                                        | 0.18982 | 0.02895 | 2.00406 | C18  | 0.43845 | 0.59075 | 1.76016 |
| C2                                        | 0.11008 | 0.10397 | 2.00283 | C19  | 0.43272 | 0.55293 | 1.98474 |
| C3                                        | 0.1278  | 0.04683 | 2.00289 | H20  | 0.22827 | 0.05779 | 2.01016 |
| C4                                        | 0.03053 | 0.82119 | 2.00184 | H21  | 0.06033 | 0.78427 | 2.00579 |
| C5                                        | 0.04955 | 0.87984 | 1.99811 | H22  | 0.13313 | 0.80645 | 1.62861 |
| C6                                        | 0.15763 | 0.85121 | 2.01264 | H23  | 0.19244 | 0.88248 | 2.40745 |
| C7                                        | 0.16316 | 0.80753 | 1.81027 | H24  | 0.21266 | 0.73289 | 1.6741  |
| C8                                        | 0.19752 | 0.85062 | 2.24099 | H25  | 0.27099 | 0.80892 | 2.45464 |
| C9                                        | 0.20713 | 0.76525 | 1.83802 | H26  | 0.31465 | 0.61889 | 2.3129  |
| C10                                       | 0.24116 | 0.80802 | 2.27185 | H27  | 0.40477 | 0.66492 | 1.54038 |
| C11                                       | 0.24675 | 0.76473 | 2.06792 | H28  | 0.38025 | 0.5348  | 2.35914 |
| C12                                       | 0.29283 | 0.72026 | 2.09513 | H29  | 0.47146 | 0.58175 | 1.59735 |
| N13                                       | 0.31514 | 0.69438 | 1.87932 | H30  | 0.30687 | 0.7098  | 2.32049 |
| C14                                       | 0.35415 | 0.6477  | 1.92092 | N31  | 0.08991 | 0       | 2       |
| C15                                       | 0.34842 | 0.61045 | 2.15031 | N32  | 0       | 0.91595 | 2       |
| C16                                       | 0.39963 | 0.6369  | 1.72243 | C33  | 0.46933 | 0.5     | 2       |
| C17                                       | 0.38668 | 0.56364 | 2.18128 | Ni34 | 0       | 0       | 0       |

**Table S2.** Fractional atomic coordinates in the refined unit cell of TPTPE-CoPor-COF.

| Space group : <i>P222</i> (TPTPE-CoPor-COF) |         |         |         |      |         |         |         |
|---------------------------------------------|---------|---------|---------|------|---------|---------|---------|
| a = 27.4053, b = 29.7918, c = 5.4579        |         |         |         |      |         |         |         |
| $\alpha = \beta = \gamma = 90^\circ$        |         |         |         |      |         |         |         |
| Atom                                        | x       | y       | z       | Atom | x       | y       | z       |
| C1                                          | 0.14518 | 0.97658 | 1.00011 | C23  | 0.31449 | 0.71606 | 0.70535 |
| C2                                          | 0.08437 | 0.91584 | 1.00276 | C24  | 0.29056 | 0.73185 | 0.91247 |
| C3                                          | 0.09739 | 0.96218 | 1.00352 | N25  | 0.25298 | 0.76191 | 0.87763 |
| C4                                          | 0.02363 | 0.85499 | 0.99891 | H26  | 0.05086 | 0.82642 | 0.99741 |
| C5                                          | 0.03801 | 0.90248 | 0.99865 | H27  | 0.17417 | 0.94977 | 0.99821 |
| C6                                          | 0.12147 | 0.87979 | 1.01369 | H28  | 0.11072 | 0.85388 | 0.64016 |
| C7                                          | 0.13241 | 0.85168 | 0.81335 | H29  | 0.13831 | 0.8953  | 1.39618 |
| C8                                          | 0.14735 | 0.87423 | 1.22772 | H30  | 0.17822 | 0.7988  | 0.65664 |
| C9                                          | 0.16959 | 0.82088 | 0.82203 | H31  | 0.20473 | 0.83886 | 1.41359 |
| C10                                         | 0.18415 | 0.8432  | 1.23786 | H32  | 0.25686 | 0.78421 | 1.23314 |
| C11                                         | 0.1966  | 0.81681 | 1.03368 | H33  | 0.48269 | 0.56915 | 0.65375 |
| C12                                         | 0.23716 | 0.78674 | 1.05371 | H34  | 0.40903 | 0.5264  | 1.31775 |
| C13                                         | 0.449   | 0.54315 | 0.98638 | H35  | 0.43457 | 0.64165 | 0.64043 |
| C14                                         | 0.45533 | 0.57541 | 0.8002  | H36  | 0.35928 | 0.59744 | 1.29418 |
| C15                                         | 0.41471 | 0.55185 | 1.16272 | H37  | 0.35051 | 0.66909 | 1.34343 |
| C16                                         | 0.42852 | 0.61533 | 0.79097 | H38  | 0.36851 | 0.6724  | 0.54953 |
| C17                                         | 0.38738 | 0.59123 | 1.15149 | H39  | 0.2873  | 0.72742 | 1.31251 |
| C18                                         | 0.39376 | 0.62399 | 0.9652  | H40  | 0.3044  | 0.73072 | 0.5204  |
| C19                                         | 0.36218 | 0.66393 | 0.94766 | N41  | 0.06792 | 0       | 1       |
| C20                                         | 0.33992 | 0.68162 | 1.15494 | N42  | 0       | 0.93187 | 1       |
| C21                                         | 0.34966 | 0.6834  | 0.72244 | Co43 | 0       | 0       | 1       |
| C22                                         | 0.30488 | 0.71435 | 1.13995 | C44  | 0.47634 | 0.5     | 1       |



**Table S3.** Metal contents of TPE-CoPor-COF and TPTPE-CoPor-COF calculated from ICP-OES tests.

| Sample          | Calculated (wt%) | Found (wt%) |
|-----------------|------------------|-------------|
| TPE-CoPor-COF   | 5.34             | 3.94        |
| TPTPE-CoPor-COF | 4.18             | 4.15        |

**Table S4.** Comparison of the electrocatalytic performance for COF-based electrocatalysts in H-cells (0.5 M KHCO<sub>3</sub> aqueous solution).

| Catalysts          | Potential (V vs. RHE) | $j_{\text{CO}}$ (mA cm <sup>-2</sup> ) | FE <sub>CO</sub> (%) | Ref       |
|--------------------|-----------------------|----------------------------------------|----------------------|-----------|
| TPE-CoPor-COF      | -1.0                  | -30.4                                  | 91                   | this work |
|                    | -0.9                  | -19.6                                  | 93                   |           |
|                    | -0.8                  | -13.1                                  | 94                   |           |
|                    | -0.7                  | -9.3                                   | 95                   |           |
| TT-Por(Co)-COF     | -0.7                  | -7.28                                  | 85                   | S12       |
| TTF-Por(Co)-COF    | -0.9                  | -6.88                                  | 78.5                 | S13       |
| Co-TTCOF           | -0.9                  | -4.2                                   | 59.5                 | S14       |
| COF-366-Co         | -0.67                 | -1.8                                   | 90                   | S15       |
| COF-367-Co         | -0.67                 | -3.3                                   | 91                   |           |
| COF-367-Co(1%)     | -0.67                 | -0.4                                   | 40                   |           |
| COF-367-Co(10%)    | -0.67                 | -0.8                                   | 70                   |           |
| COF-300            | -0.85                 | -0.13                                  | 53                   | S16       |
| COF-300-AR         | -0.85                 | -1.82                                  | 80                   |           |
| TAPP(Co)-B18C6-COF | -1.0                  | -9.45                                  | 71.5                 | S17       |

## REFERENCES

- [1] R. Chen, Y. Wang, Y. Ma, A. Mal, X. Gao, L. Gao, L. Qiao, X. Li, L. Wu and C. Wang, *Nat. Commun.*, 2021, **12**, 1354.
- [2] C. Adamo and V. Barone, *J. Chem. Phys.* 1999, **110**, 6158–6170.
- [3] S. Grimme, S. Ehrlich and L. Goerigk, *J. Comput. Chem.* 2011, **32**, 1456–1465.
- [4] D. Andrae, U. Häußermann, M. Dolg, H. Stoll and H. Preuß, *Theor. Chim. Acta* 1990, **77**, 123–141.
- [5] P. C. Hariharan and J. A. Pople, *Theor. Chim. Acta* 1973, **28**, 213–222.
- [6] M. S. Gordon, The Isomers of Silacyclopropane. *Chem. Phys. Lett.* 1980, **76**, 163–168.
- [7] R. Binning and L. Curtiss, *J. Comput. Chem.* 1990, **11**, 1206–1216.
- [8] M. J. Frisch, G. W. Trucks, H. B. Schlegel, G. E. Scuseria, M. A. Robb, J. R. Cheeseman, G. Scalmani, V. Barone, B. Mennucci, G. A. Petersson, H. Nakatsuji, M. Caricato, X. Li, H. P. Hratchian, A. F. Izmaylov, J. Bloino, G. Zheng, J. L. Sonnenberg, M. Hada, M. Ehara, K. Toyota, R. Fukuda, J. Hasegawa, M. Ishida, T. Nakajima, Y. Honda, O. Kitao, H. Nakai, T. Vreven, J. A. Montgomery, Jr., J. E. Peralta, F. Ogliaro, M. Bearpark, J. J. Heyd, E. Brothers, K. N. Kudin, V. N. Staroverov, T. Keith, R. Kobayashi, J. Normand, K. Raghavachari, A. Rendell, J. C. Burant, S. S. Iyengar, J. Tomasi, M. Cossi, N. Rega, J. M. Millam, M. Klene, J. E. Knox, J. B. Cross, V. Bakken, C. Adamo, J. Jaramillo, R. Gomperts, R. E. Stratmann, O. Yazyev, A. J. Austin, R. Cammi, C. Pomelli, J. W. Ochterski, R. L. Martin, K. Morokuma, V. G. Zakrzewski, G. A. Voth, P. Salvador, J. J.

- Dannenberg, S. Dapprich, A. D. Daniels, O. Farkas, J. B. Foresman, J. V. Ortiz, J. Cioslowski, and D. J. Fox, Gaussian 09, Version D.01, Gaussian, Inc., Wallingford CT, 2013.
- [9] A. V. Marenich, C. J. Cramer and D. G. Truhlar, *J. Phys. Chem. B*, 2009, **113**, 6378-6396.
- [10] K. Chan and J. K. Nørskov, *J. Phys. Chem. Lett.* 2015, **6**, 2663–2668.
- [11] A. A. Peterson, F. Abild-Pedersen, F. Studt, J. Rossmeisl, and J. K. Nørskov, *Energy Environ. Sci.* 2010, **3**, 1311–1315.
- [12] Q. Wu, M. J. Mao, Q. J. Wu, J. Liang, Y. B. Huang and R. Cao, *Small*, 2021, **17**, 2004933.
- [13] Q. Wu, R. Xie, M. Mao, G. Chai, J. Yi, S. Zhao, Y. Huang and R. Cao, *ACS Energy Lett.*, 2020, **5**, 1005-1012.
- [14] H. Zhu, M. Lu, Y. Wang, S. Yao, M. Zhang, Y. Kan, J. Liu, Y. Chen, S. Li and Y. Lan, *Nat. Commun.*, 2020, **11**, 497.
- [15] S. Lin, C. S. Diercks, Y. B. Zhang, N. Kornienko, E. M. Nichols, Y. Zhao, A. R. Paris, D. Kim, P. Yang, O. M. Yaghi and C. J. Chang, *Science*, 2015, **349**, 1208-1213.
- [16] H. Liu, J. Chu, Z. Yin, X. Cai, L. Zhuang and H. Deng, *Chem*, 2018, **4**, 1696-1709.
- [17] S. An, C. Lu, Q. Xu, C. Lian, C. Peng, J. Hu, X. Zhuang and H. Liu, *ACS Energy Lett.*, 2021, **6**, 3496-3502.
